# Supplementary material for: The Draft Genome of Yellow Stem Borer, an Agriculturally Important Pest, Provides Molecular Insights into Its Biology, Development and Specificity Towards Rice for Infestation
Source: MDPI journal article supplement (doi:10.3390/insects12060563), 2021-06-19

Draft genome of Yellow Stem borer, an agriculturally important pest provides molecular insights into its biology, development and specificity towards rice for infestation

Divya Kattupalli<sup>1#</sup>, Kalyani M. Barbadikar<sup>1#</sup>, Vishalakshi B<sup>1</sup>, Suneel B<sup>1</sup>, Athulya R<sup>2</sup>, Padmakumari A.P<sup>2</sup>, Swati Saxena<sup>3</sup>, Kishor Gaikwad<sup>3</sup>, Sridhar Y<sup>2</sup>, Premalatha K<sup>4</sup>, Sheshu Madhav Maganti<sup>1\*</sup>

Supplementary Figures

Figure 1: Gene Ontology Analysis

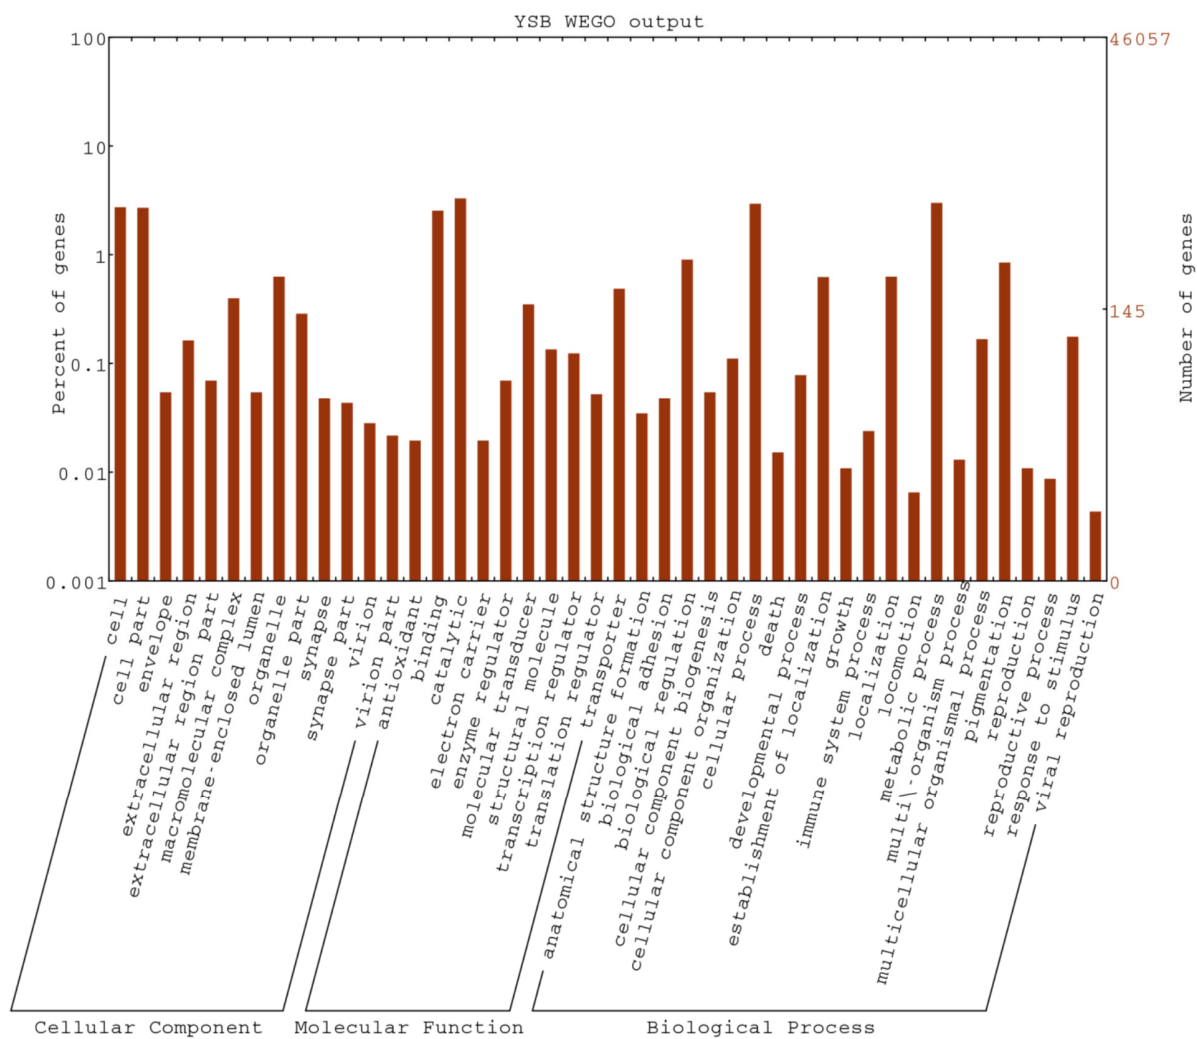

**Figure 2:** COG class distribution for YSB sample

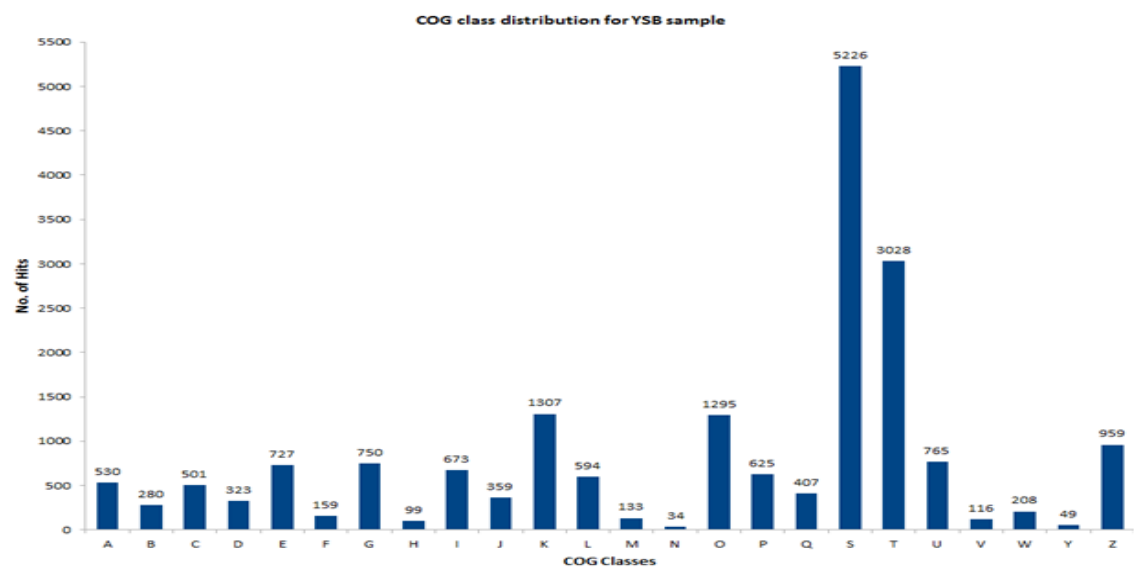

**Supplementary Figure 3:** Phylogenetic relationships of the Ecdysone receptor gene in *Scirpophaga incertulas* compared to other insects.

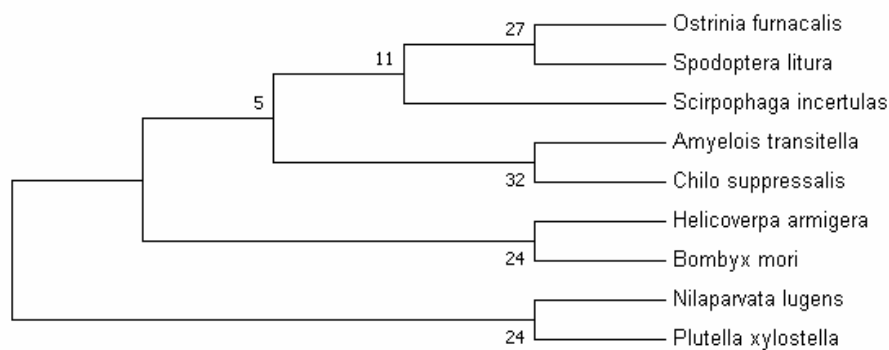

**Supplementary Figure 4:** Phylogenetic relationships of the Pheromone binding gene in *Scirpophaga incertulas* compared to other insects.

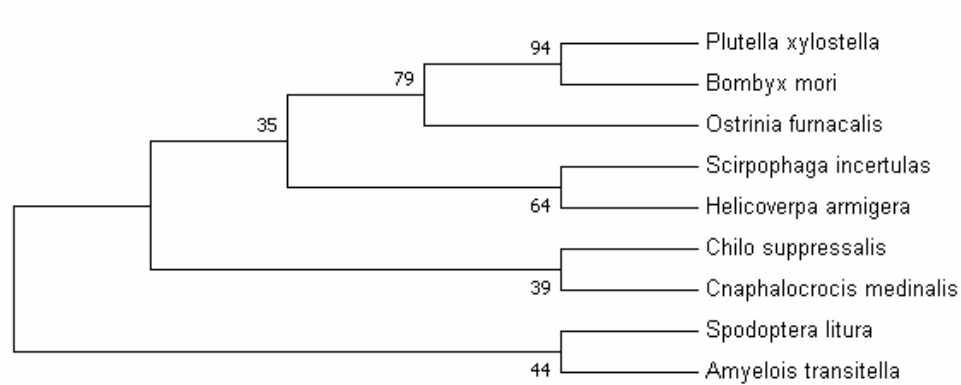

**Supplementary Figure 5:** Phylogenetic relationships of the Vitellogenin gene in *Scirpophaga incertulas* compared to other insects.

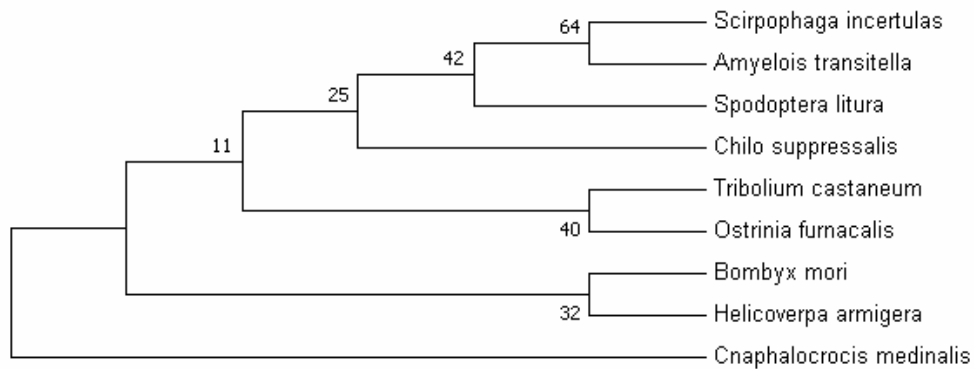

**Supplementary Figure 6:** Phylogenetic relationships of the Long wavelength opsin gene in *Scirpophaga incertulas* compared to other insects.

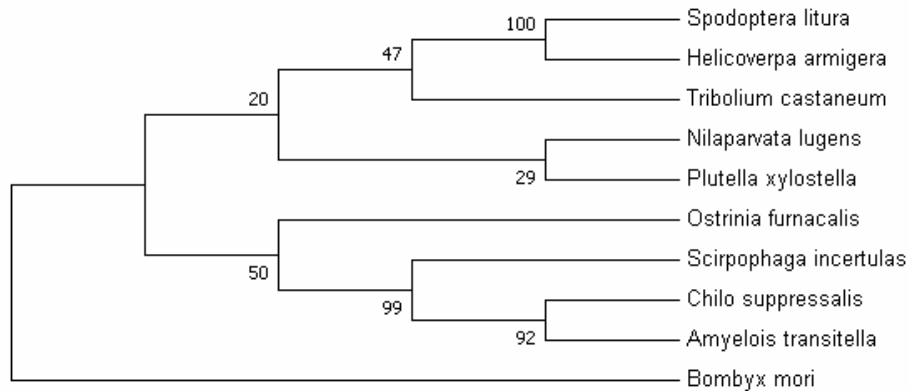

**Supplementary Figure 7:** Phylogenetic relationships of the Metabotropic chemosensory receptor gene in *Scirpophaga incertulas* compared to other insects.

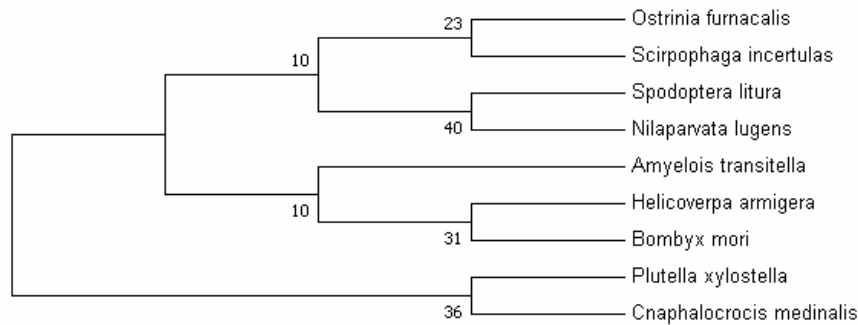

**Supplementary Figure 8:** Phylogenetic relationships of the Aminopeptidase N gene in *Scirpophaga incertulas* compared to other insects.

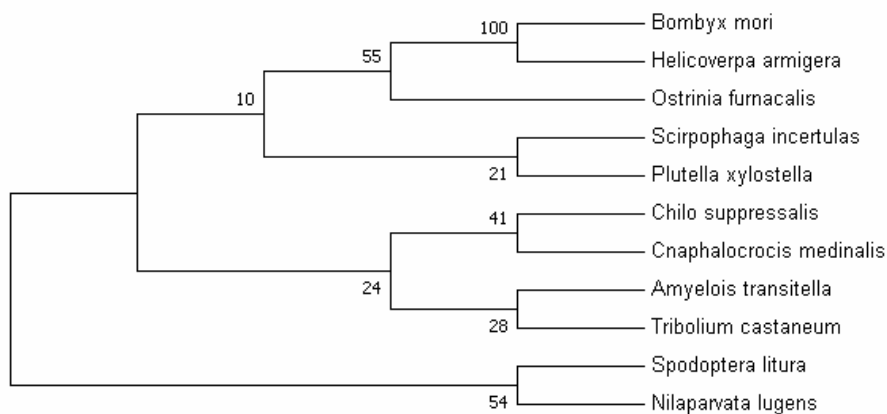

**Supplementary Figure 9:** Phylogenetic relationships of the Serine protease gene in *Scirpophaga incertulas* compared to other insects.

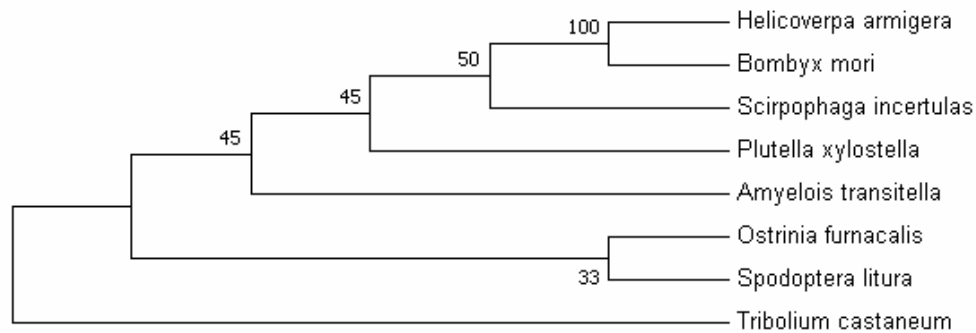

**Supplementary Figure 10:** Phylogenetic relationships of the Alpha-Amylase gene in *Scirpophaga incertulas* compared to other insects.

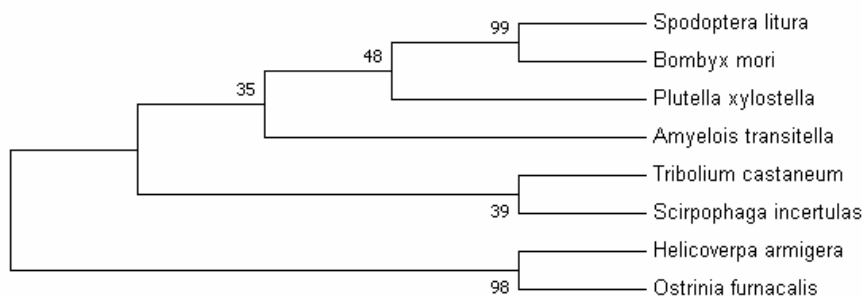

**Supplementary Figure 11:** Phylogenetic relationships of the Cacophony gene in *Scirpophaga incertulas* compared to other insects.

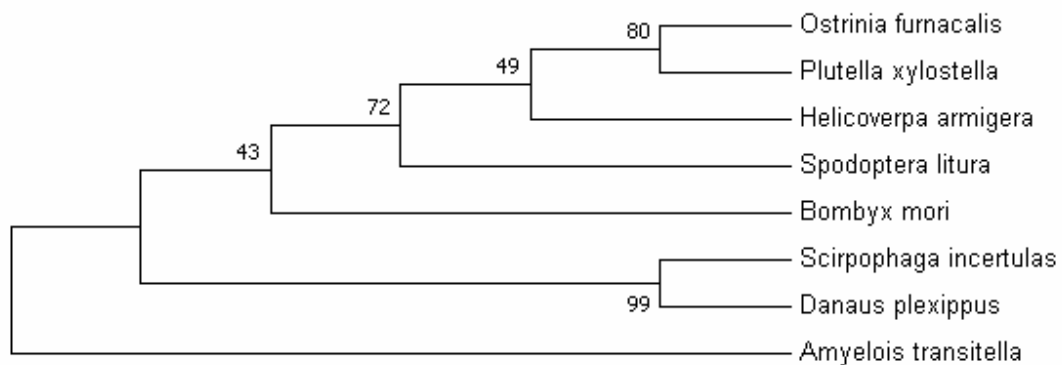

**Supplementary Figure 12:** Phylogenetic relationships of the Alan Shepard gene in *Scirpophaga incertulas* compared to other insects.

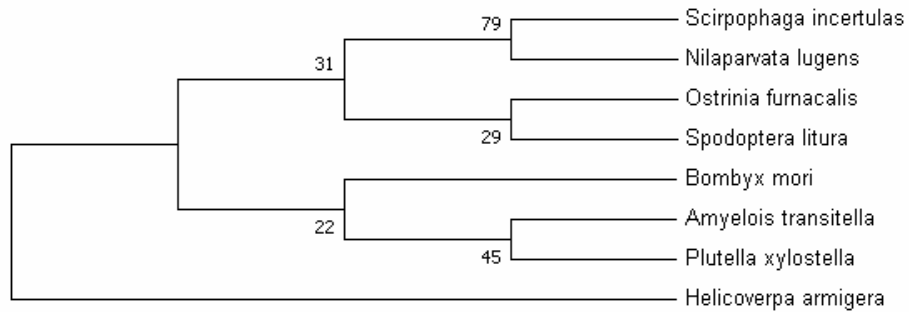

**Supplementary Figure 13:** Phylogenetic relationships of the Annoxia gene in *Scirpophaga incertulas* compared to other insects.

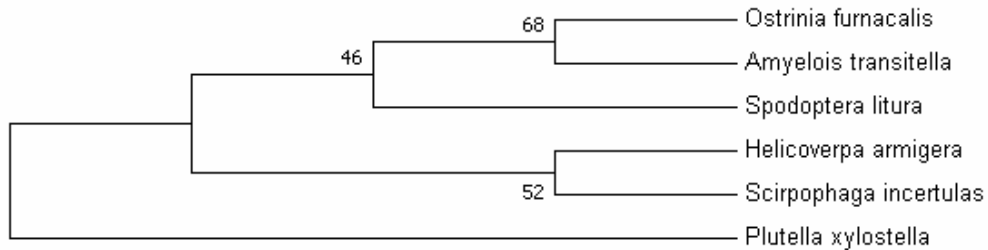

**Supplementary Figure 14:** Phylogenetic relationships of the Serotonin receptor gene in *Scirpophaga incertulas* compared to other insects.

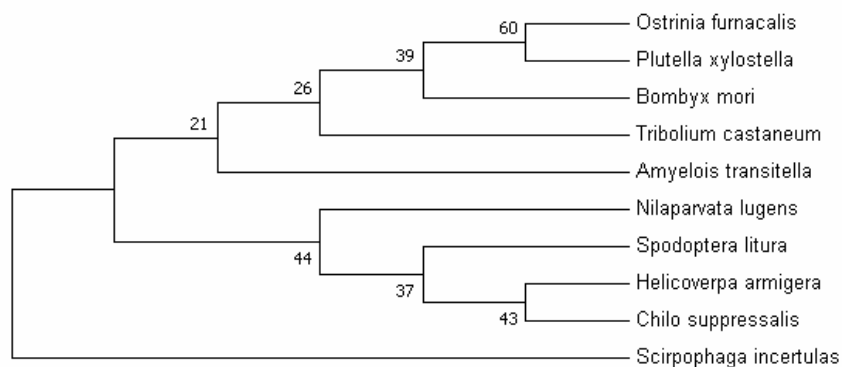

**Supplementary Figure 15:** Phylogenetic relationships of the Gamma-aminobutyric acid (GABA) gene in *Scirpophaga incertulas* compared to other insects.

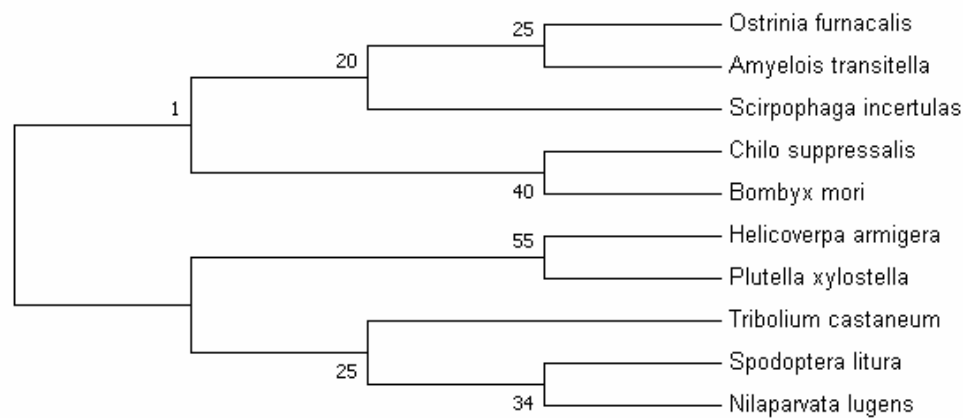

**Supplementary Figure 16:** Phylogenetic relationships of the Venom gene in *Scirpophaga incertulas* compared to other insects.

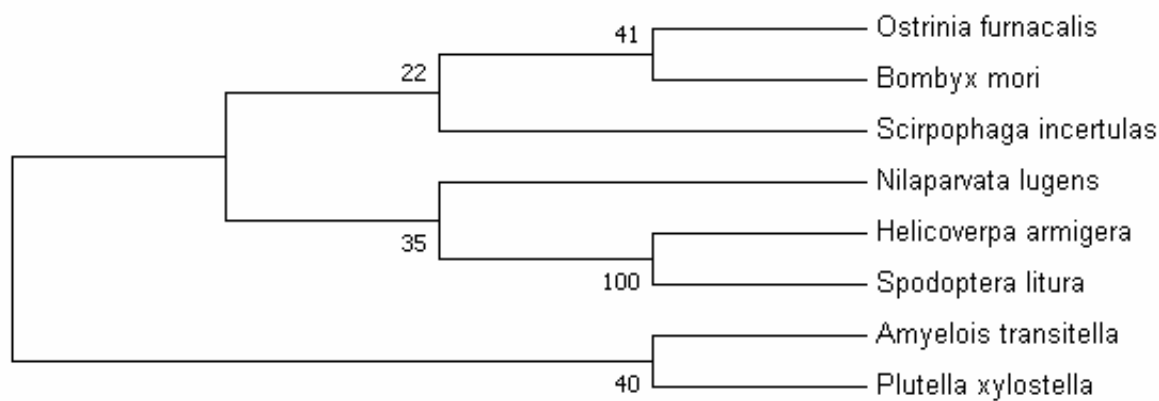

**Supplementary Figure 17: Evolutionary timeline analysis**

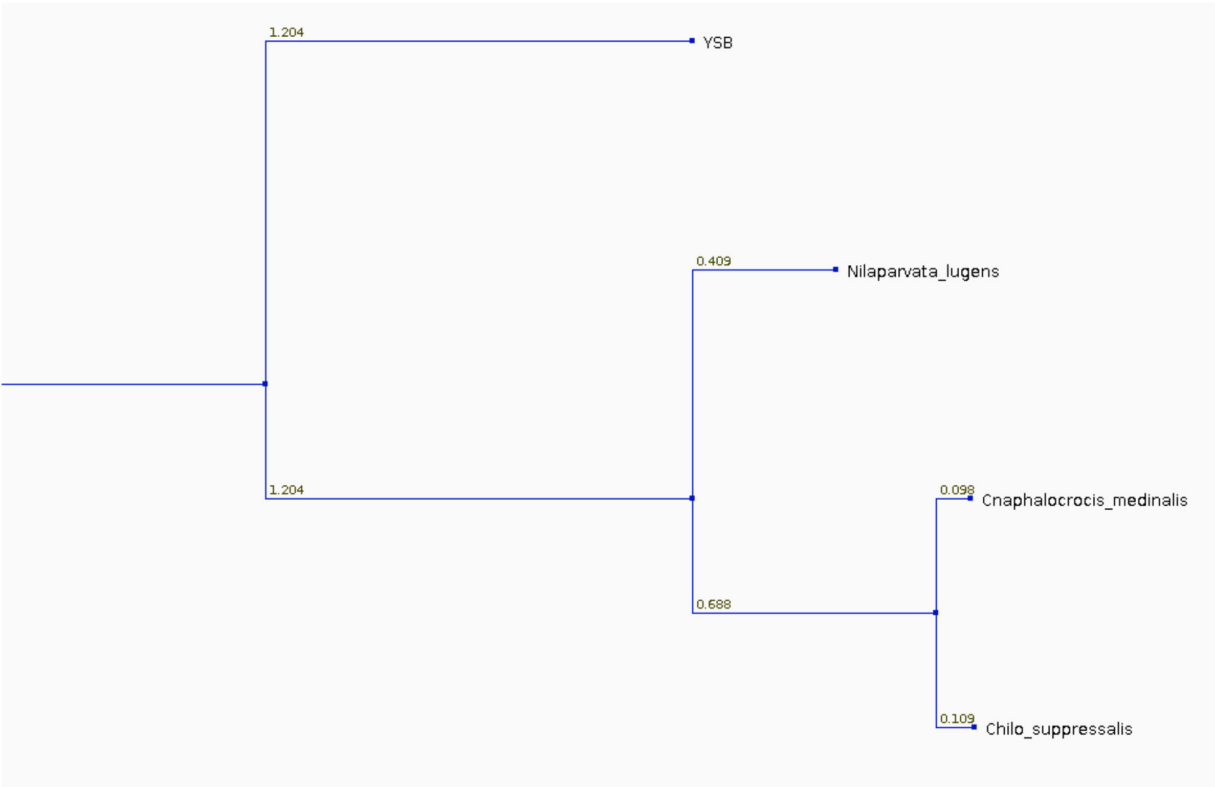

Supplement: s1 [file s1]
