# Supplementary material for: The Draft Genome of Yellow Stem Borer, an Agriculturally Important Pest, Provides Molecular Insights into Its Biology, Development and Specificity Towards Rice for Infestation
Source: Insects. 2021 Jun 19;12(6):563. doi: 10.3390/insects12060563 (PMC8234988; doi:10.3390/insects12060563)
Supplement: Supplementary file 1 [file insects-12-00563-s001.zip › YSB_Supplementary Tables.xlsx]

## Sheet: Table 1
The draft genome of Yellow Stem Borer, an agriculturally important pest, provides molecular insights into its biology, development and specificity towards rice for infestation
Divya Kattupalli1#, Kalyani M. Barbadikar1#, Vishalakshi B1, Suneel B1, Athulya R2, Padmakumari A.P2, Swati Saxena3, Kishor Gaikwad3, Sridhar Y 2, Premalatha K4, Sheshu Madhav Maganti1*
	Supplementary Tables
Supplementary Table 1 : Scaffold Length Distribution
	YSB Sample Scaffold Size Range	No. of Scaffold
	200≤ Scaffold < 500	1,00,771
	500 ≤ Scaffold < 1000	1,01,198
	1000 ≤ Scaffold < 2000	82121
	2000 ≤ Scaffold < 3000	16669
	3000 ≤ Scaffold < 4000	5346
	4000 ≤ Scaffold < 5000	2077
	Scaffold ≥ 5000	2430

## Sheet: Table 2
Supplementary Table 2 : KEGG Pathway Analysis
	Pathway Categories	# Gene
	Metabolism
	Carbohydrate metabolism	264
	Energy metabolism	144
	Lipid metabolism	200
	Nucleotide metabolism	121
	Amino acid metabolism	180
	Metabolism of other amino acids	69
	Glycan biosynthesis and metabolism	83
	Metabolism of cofactors and vitamins	105
	Xenobiotics biodegradation and metabolism	63
	Genetic Information Processing
	Transcription	120
	Translation	237
	Folding, sorting and degradation	250
	Replication and repair	65
	Environmental Information Processing
	Membrane transport	26
	Signal transduction	725
	Signaling molecules and interaction	116
	Cellular Processes
	Transport and catabolism	389
	Cell growth and death	255
	Cellular community - eukaryotes	224
	Cellular community - prokaryotes	10
	Cell motility	71
	Organismal Systems
	Immune system	235
	Endocrine system	363
	Circulatory system	104
	Digestive system	139
	Excretory system	88
	Nervous system	217
	Sensory system	86
	Development	103
	Aging	109
	Environmental adaptation	69

## Sheet: Table 3
Supplementary Table 3 : Non-coding RNAs
	Biotype	Family ID	Number
	Cis-reg	Histone3	8
		K_chan_RES	3
		s2m	1
		UnaL2	1
		ydaO-yuaA	1
		ykoK	1
		ZMP-ZTP	1
	Cis-reg; riboswitch	Cobalamin	1
	Gene	Metazoa_SRP	6
	Gene; antisense	RNAI	1
	Gene; lncRNA	Sphinx_2	1
	Gene; miRNA	let-7	1
		mir-1	1
		mir-10	1
		mir-11	1
		mir-124	1
		mir-133	1
		mir-137	1
		mir-184	1
		MIR1846	1
		mir-186	1
		mir-190	1
		mir-2	1
		mir-210	1
		mir-233	4
		mir-252	1
		mir-26	1
		mir-263	1
		mir-276	1
		mir-2780	6
		mir-282	1
		mir-305	1
		mir-31	1
		mir-317	1
		mir-33	1
		miR-430	1
		mir-449	1
		mir-46	1
		MIR480	1
		mir-67	1
		mir-7	1
		mir-8	2
		MIR811	1
		mir-9	3
		mir-927	1
		mir-929	1
		mir-932	1
		mir-981	1
	Gene; ribozyme	RNase_MRP	1
		RNaseP_nuc	1
	Gene; rRNA	5_8S_rRNA	1
		5S_rRNA	40
		LSU_rRNA_bacteria	8
		LSU_rRNA_eukarya	6
		SSU_rRNA_bacteria	9
		SSU_rRNA_eukarya	2
	Gene; snRNA; snoRNA; CD-box	U3	11
		snosnR61	1
		SNORD36	1
		snoMe28S-Am982	1
	Gene; snRNA; snoRNA; HACA-box	SNORA57	1
		SNORA53	1
		SNORA14	1
	Gene; snRNA; splicing	U1	8
		U11	2
		U12	1
		U2	3
		U4	2
		U4atac	1
		U5	3
		U6	11
		U6atac	12
	Gene; sRNA	suhB	1
		Ms_IGR-7	1
	Gene; tRNA	tRNA	813
	Intron	Intron_gpII	1
	N/A	nhaA-I	1
	N/A	ilvH	1

## Sheet: Table 4
Supplementary Table 4 : Summary of transposable elements in the YSB genome
	Description	No. of elements
	SINEs	55
	ALUs	16
	MIRs	13
	LINEs	760
	LINE1	45
	LINE2	118
	L3/CR1	459
	LTR elements	120
	ERVL	18
	ERVL-MaLRs	11
	ERV_classI	29
	ERV_classII	7
	Copia protein	19
	Hypothetical protein 2 – silkworm transposon mag	1
	Transposon Ty3-G Gag-Pol poly	24
	Transposon Ty3-I Gag-Pol poly	8
	Retrovirus-related Pol poly from transposon gypsy	1
	Reverse transcriptase – silkworm transposon Pao	4
	Non-LTR retrotransposon
	Non-LTR retrotransposon	4
	Non-LTR retrotransposon R1Bmks ORF1	14
	Non-LTR retrotransposon R1Bmks ORF2	15
	Achain Endonuclease Domain Of A Telomere-Specific Non-Ltr Retrotransposon	2
	Nucleic-acid-binding from mobile element jockey-like	3
	RNA-directed DNA polymerase from mobile element jockey-like	436
	lian-aa1 retrotransposon	2
	Transposable element Tc3 transposase	21
	Transposable element Tcb1	2
	Transposable element Tcb2	9
	Retrotransposons
	Retrotransposable element SLACS 132 kDa	3
	Retrotransposable element Tf2 155 kDa type 1	15
	Retrotransposable element, partial	3
	Other retrotransposon proteins	11
	Retrovirus-related Pol poly from transposon	8
	Retrovirus-related Pol poly from transposon 412	2
	Retrovirus-related pol poly from transposon tnt	87
	Retrovirus-related Pol poly from type-1 retrotransposable element	83
	Retrovirus-related Pol poly from type-2 retrotransposable element	1
	RNA-directed DNA polymerase from transposon	39
	RNA-directed DNA polymerase from transposon X-element	84
	Blastopia poly	2
	DNA elements	1500
	hAT-Charlie	441
	TcMar-Tigger	146
	Pogo transposable element with ZNF domain	1
	Tigger transposable element-derived	39
	Transposon-derived Buster3 transposase	1
	PiggyBac transposable element-derived	74
	Helentron 5 helitron transposon replicase helicase endonuclease	2
	PREDICTED: merlin-like, partial	1
	Transposase, Mutator family, partial	1
	AC transposable element-derived	5
	Mariner Mos1 transposase	9
	Mariner transposase	15
	DD41D transposase	6
	DD34D transposase	14
	DD37D maT transposase	1
	DDE transposase	1
	Camar1 transposase	1
	PiggyBac transposase Uribo1	2
	Transposase yabusame-1	1
	AC transposase	2
	DNA-mediated transposase	5
	Other Transposable element
	Transposon Tf2-6 poly	1
	Transposon TX1 hypothetical protein	5
	Hypothetical protein 1 – cabbage looper transposon TED	3
	bel12 ag transposon	4
	Putative uncharacterized transposon-derived protein	4
	Transposase and inactivated family	1
	Transposase	53
	Tn3 family transposase	2
	Nucleic-acid-binding from transposon	15
	Unclassified	210
	Total	5120

## Sheet: Table 5
Supplementary Table 5 : Body Structural Genes
	Body Developmental Genes
	Larval cuticle	13
	Larval cuticle-like precursor	5
	Larval pupal cuticle protein	3
	Pupal cuticle protein	12
	Cuticle -like	51
	Cuticle like precursor	2
	Flexible cuticle 12-like	4
	Naked cuticle homolog	2
	Endocuticle structural glyco	11
	Antenna
	Distal antenna-like	1
	Antennal carboxylesterase	8
	Antennal esterase	10
	Different segments of the antenna
	Aristaless 2	1
	Homeobox aristaless-like	3
	Atonal	2
	Sal 3 isoform	1
	Eye
	Eyes shut	4
	Eye-specific diacylglycerol kinase-like	11
	Winged eye isoform	2
	Retinal Determination Network
	Twin of eyeless	1
	Sine oculis	3
	Eyes absent homolog	3
	Dachshund	5
	Retinal homeobox	5
	Eyegone protein	1
	Retinal degeneration	1
	Retinaldehyde-binding protein	1
	HOX genes
	Antennapedia complex
	labial	1
	homeotic proboscipedia	1
	Deformed	2
	Deformed epidermal autoregulatory	2
	Sex combs reduced	1
	Antennapedia protein	1
	Homeotic antennapedia	1
	Bithorax complex
	Homeotic ultrabithorax	1
	Ultrabithorax (UBX)	3
	Abdominal-A transcript	1
	Homeobox abdominal-A-like	1
	Homeobox abdominal-B-like	1
	Genes regulated by Hox proteins
	Distal-less	2
	Homeotic distal-less	2
	Protein decapentaplegic	1
	Mothers against decapentaplegic homolog	1
	Hox cofactors
	Homeobox extradenticle isoform X2	3
	Homeobox homothorax	5
	Defective proboscis extension response	2
	Maxillopedia	1
	Trithorax group osa	6
	Trachealess	3
	Wing development
	Homeobox protein engrailed	2
	Hedgehog protein	8
	Hedgehog receptor	1
	Apterous-like isoform X1	2
	Apterous homeodomain	2
	Protein serrate	4
	Achaete-scute complex	4
	Wingless	1
	Homeobox Hox	7
	Brain-specific homeobox homolog	1
	Homeobox genes
	Homeobox	3
	Homeobox bagpipe-like	3
	Homeobox B-H1-	2
	Homeobox ceh	2
	Homeobox cut	4
	Homeobox DBX1	2
	Homeobox HMX3	3
	Homeobox MOX-2	3
	homeobox MSH-B-like	2
	Homeobox Nkx	4
	Homeobox orthopedia	6
	Homeobox OTX1 isoform X2	2
	Homeobox PKNOX2-	4
	Homeobox prospero	2
	Homeobox rough-like	2
	Homeobox slou	2
	Homeobox unc-4	2
	LIM homeobox	13
	Polyhomeotic	4
	Homeodomain-interacting kinase	11
	Other homeobox proteins	10
	Wing Development – vestigial & scalloped
	Protein vestigial	2
	Transcription cofactor vestigial	2
	Scalloped, partial	1
	Protein vein	2
	Homeotic spalt-major	3
	Motor neuron and pancreas homeobox 1	1
	Muscle segmentation homeobox	4
	Paired mesoderm homeobox 2A-like	2
	Pituitary homeobox 1 isoform X1	3
	T-cell leukemia homeobox 2	2
	Tetra-peptide repeat homeobox 1-like	2
	Patterning
	Dorsal root ganglia homeobox -like	2
	Dorsal-ventral patterning Sog	3
	Embryonic polarity dorsal isoform A	1
	Muscle M-line assembly unc-89	10
	Doublesex- and mab-3-related transcription factor	4
	Doublesex female specific variant	1
	Sister of odd and bowel	1
	Bicaudal C	9
	Daughterless isoform	2

## Sheet: Table 6
Supplementary Table 6 : YSB Transcription factors
	Transcription factors
	Various domain containing zinc fingers	391
	Forkhead box	26
	Homeodomain transcription factor	2
	Heat shock factor	1
	Heat shock protein	1
	Helix-loop-helix	9
	Leucine-zipper-like transcriptional regulator	7
	MYB isoform	16
	Hormone receptor	23
	Iroquois-class homeodomain IRX-5	1
	Homeobox araucan	3
	Homeobox caupolican-like	1
	Transcription factor Sox	11
	Methoprene-tolerant	2
	Krueppel-like factor	8
	Transcription factor cwo	1
	BTB Domain
	Bric-a-brac	6
	Protein tramtrack	4
	Broad-complex core isoform	9
	BTB POZ domain-containing	14
	Ankyrin repeat and BTB POZ domain-containing	6
	Kelch repeat and BTB domain-containing	1
	Zinc finger and BTB domain-containing	6

## Sheet: Table 7
Supplementary Table 7 : Hormonal Development
	Juvenile Hormone
	Juvenile hormone acid methyltransferase	4
	Farnesoic acid O-methyltransferase	2
	Juvenile hormone esterase	5
	Juvenile hormone epoxide	7
	Juvenile hormone binding brP-1649	1
	Juvenile hormone diol	1
	Farnesol dehydrogenase	2
	Farnesyl synthase	5
	Molting Hormone
	Prothoracicotropic hormone precursor	3
	Ecdysone 20-monooxygenase	4
	Zinc finger on ecdysone puffs	7
	Ecdysteroid	6
	Estradiol 17-beta-dehydrogenase	3
	Ecdysone-induced	5
	Ecdysone receptor	4
	Eclosion hormone precursor	1
	Other Hormones
	Adipokinetic hormone 1 precursor	1
	Adipokinetic hormone receptor	3
	Vitellogenin	5
	Vitellogenin receptor	8

## Sheet: Table 8
Supplementary Table 8 : Epigenetic Genes
	Epigenetic pathways
	Histone deacetylase	13
	Histone acetyltransferase	10
	Histone lysine demethylase	6
	Histone-arginine methyltransferase CARMER-like	1
	Histone-lysine N-methyltransferase	201
	DNA cytosine-5 methyltransferase	2
	Site-specific DNA-methyltransferase	4

## Sheet: Table 9
Supplementary Table 9 : Visual Perception
	Visual perception
	Opsin	3
	Long wavelength opsin	1
	UV opsin	4
	Blue opsin	3
	Rhodopsin-like G- coupled receptor	1
	Ceropsin	1
	Parapinopsin	1
	Pinopsin-like	1
	Receptor peropsin	2
	Ommochrome-binding -like	4
	Retinol dehydrogenase	13
	Retinal dehydrogenase 1-like	4
	Retinal homeobox Rx1-like	4
	Neural retina-specific leucine zipper -like	1
	Visual system homeobox 2	3
	Cyclic nucleotide-gated channel rod photoreceptor subunit	2
	Retinal degeneration A	1
	Retinaldehyde-binding protein 1-like	1
	Receptors
	G -coupled receptor	48
	Receptor guanylyl cyclase	5
	Soluble guanylyl cyclase	6
	Neuropeptide precursor	6
	Neuropeptide receptor	46

## Sheet: Table 10
Supplementary Table 10 : Chemosensory Receptors
	Chemoreceptors
	Odorant receptor	21
	Odorant-binding protein	12
	General odorant-binding protein	5
	Pheromone binding protein	2
	Pheromone receptor	1
	Odorant degrading enzyme	1
	Gustatory receptor	17
	Gustatory and odorant receptor 24	1
	Ionotropic receptor	29
	Ionotropic glutamate receptor	14
	Chemosensory protein	16
	Chemosensory ionotropic receptor IR75d	1
	Sensory neuron membrane protein	3
	Metabotropic glutamate receptor	17

[truncated: 10 more sheets: Table 11, Table 12, Table 13, Table 14, Table 15, Table 16, Table 17, Table 18, Table 19, Table 20]
